# Supplementary material
Source: bioRxiv or medRxiv preprint supplement (https://medrxiv.org/highwire/filestream/95638/field_highwire_adjunct_files/0/2020.09.03.20184556-1.pdf)
Supplement: Supplementary file [file 2020.09.03.20184556-1.pdf]

# Supplementary Figures

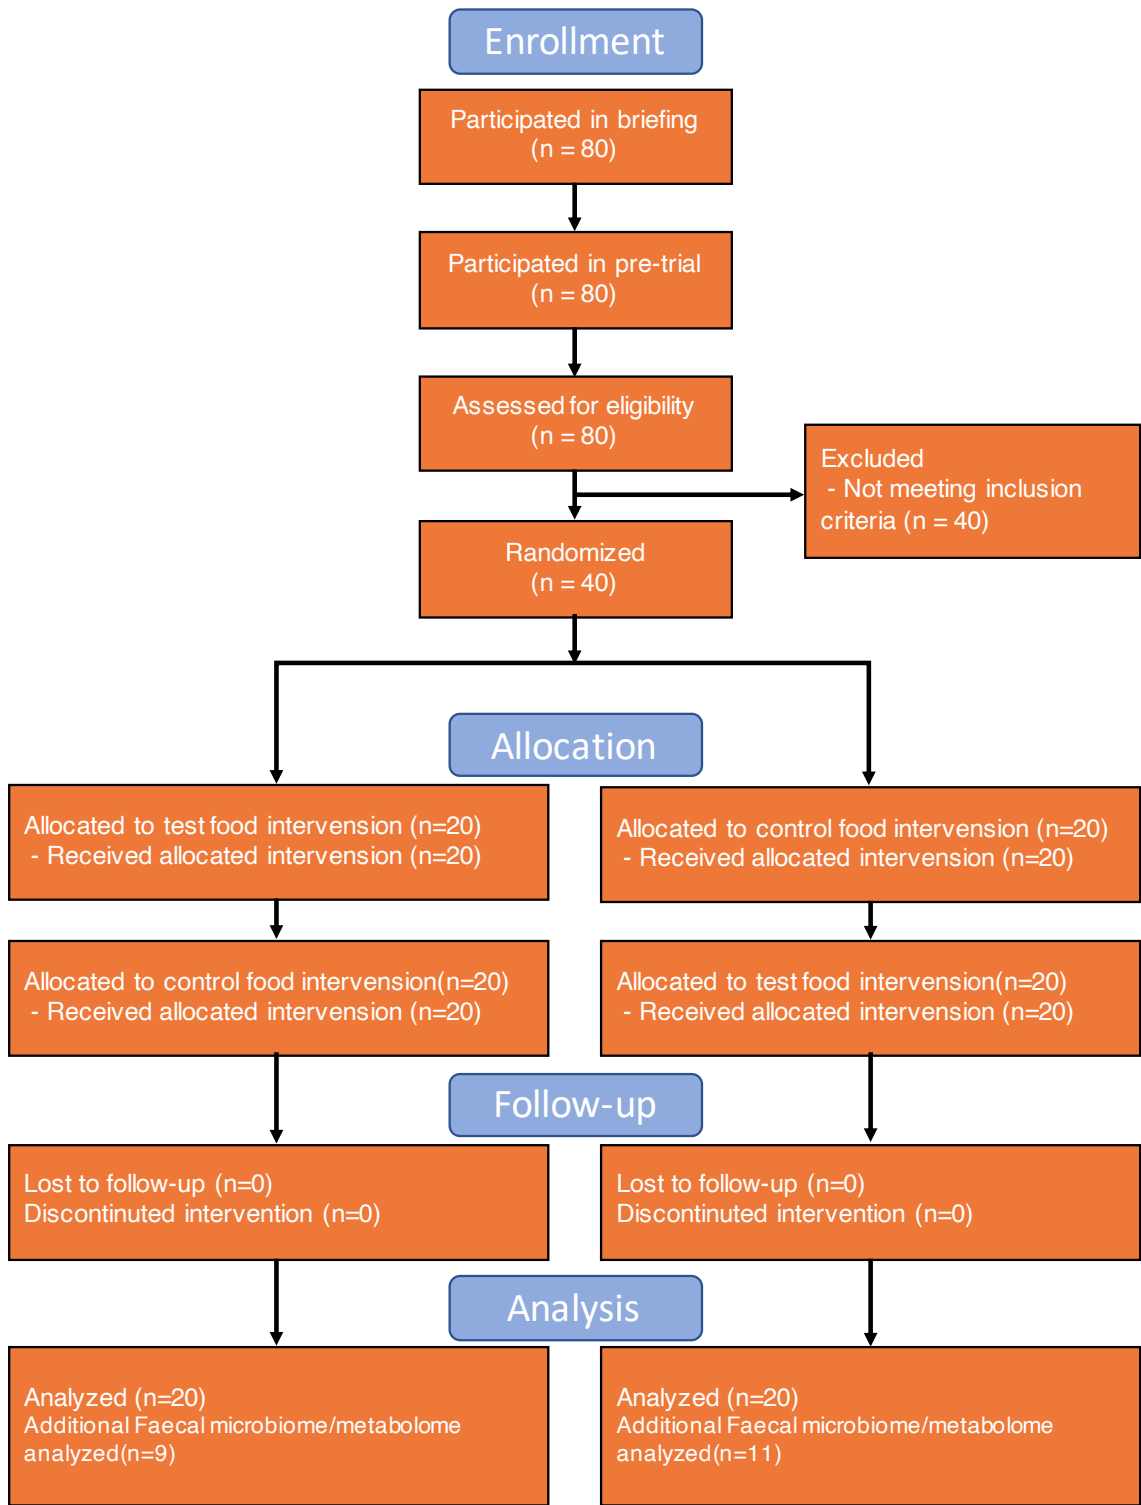

**Fig. S1. Flow diagram of the phases of the randomized double-blind placebo-controlled crossover study.**
